# Supplementary material for: Tanzawaic acids I–L: Four new polyketides from Penicillium sp. IBWF104-06
Source: PubMed Central journal article supplement (PMC3943810; doi:10.3762/bjoc.10.20), 2014-01-22
Supplement: Beilstein_J_Org_Chem-10-251-s001.pdf [file Beilstein_J_Org_Chem-10-251-s001.pdf]

## Supporting Information

for

### Tanzawaic acids I–L: Four new polyketides from *Penicillium* sp. IBWF104-06

Louis P. Sandjo<sup>1</sup>, Eckhard Thines<sup>2,3</sup>, Till Opatz<sup>\*,1</sup> and Anja Schüffler<sup>\*,2</sup>

Address: <sup>1</sup>Johannes-Gutenberg-University Mainz, Institute of Organic Chemistry, Duesbergweg 10-14, D-55128 Mainz, Germany, <sup>2</sup>Institute of Biotechnology and Drug Research, Erwin-Schroedinger-Strasse 56, D-67663, Kaiserslautern, Germany and <sup>3</sup>Johannes-Gutenberg-University Mainz, Institute of Biotechnology and Drug Research, Duesbergweg 10–14, D-55128 Mainz, Germany

Email: Anja Schüffler\* - [schueffler@ibwf.de](mailto:schueffler@ibwf.de); Till Opatz\* - [opatz@uni-mainz.de](mailto:opatz@uni-mainz.de)

\*Corresponding author

### NMR spectra and crystallographic data

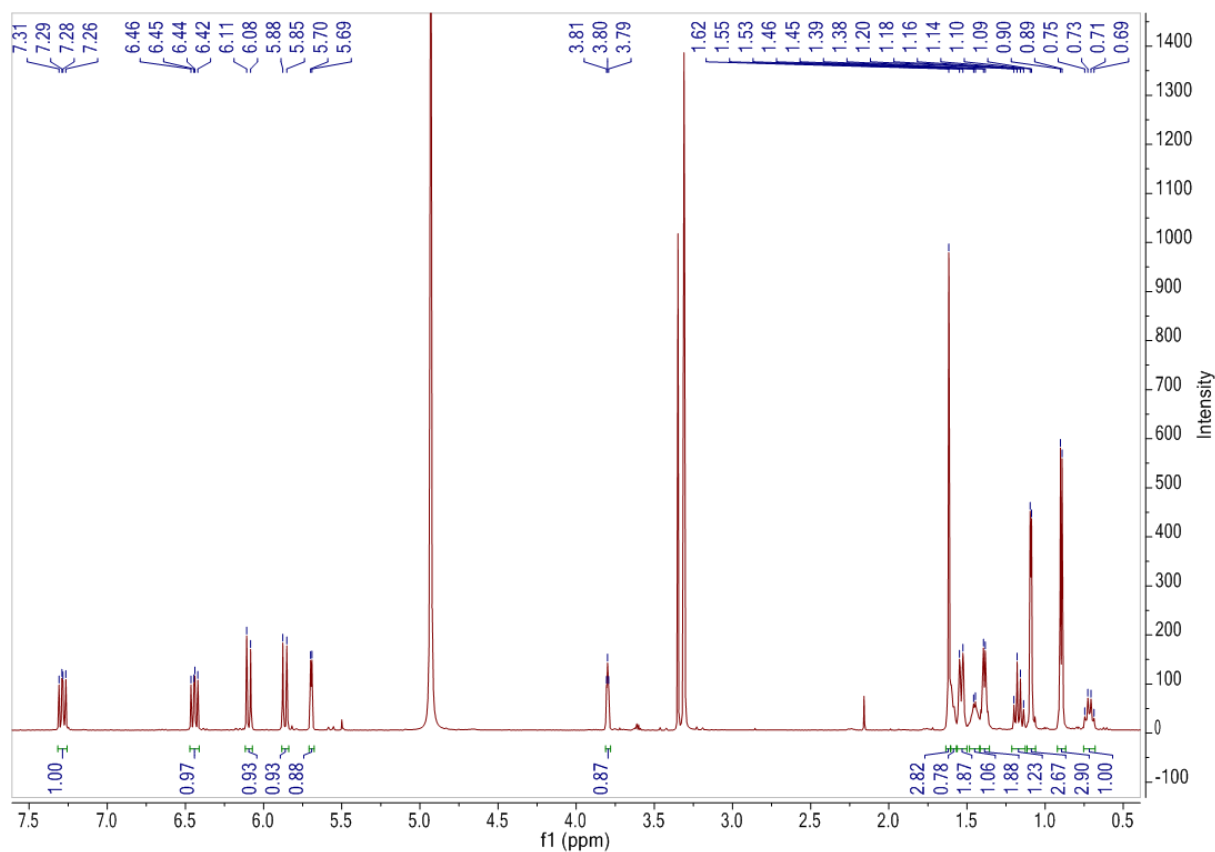

Figure S1:  $^1\text{H}$  NMR spectrum of tanzawaic acid I (**1**) ( $\text{CD}_3\text{OD}$ ).

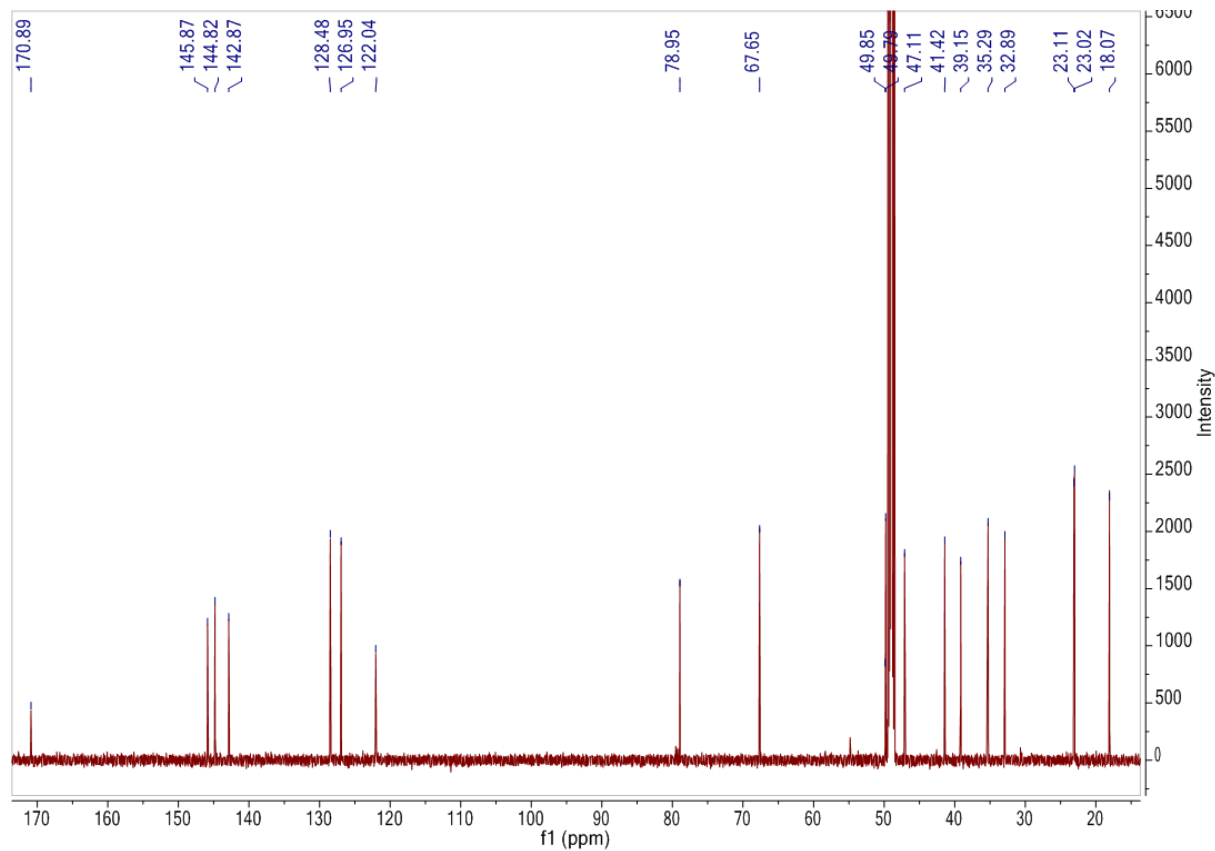

Figure S2:  $^{13}\text{C}$  NMR spectrum of tanzawaic acid I (**1**) ( $\text{CD}_3\text{OD}$ ).

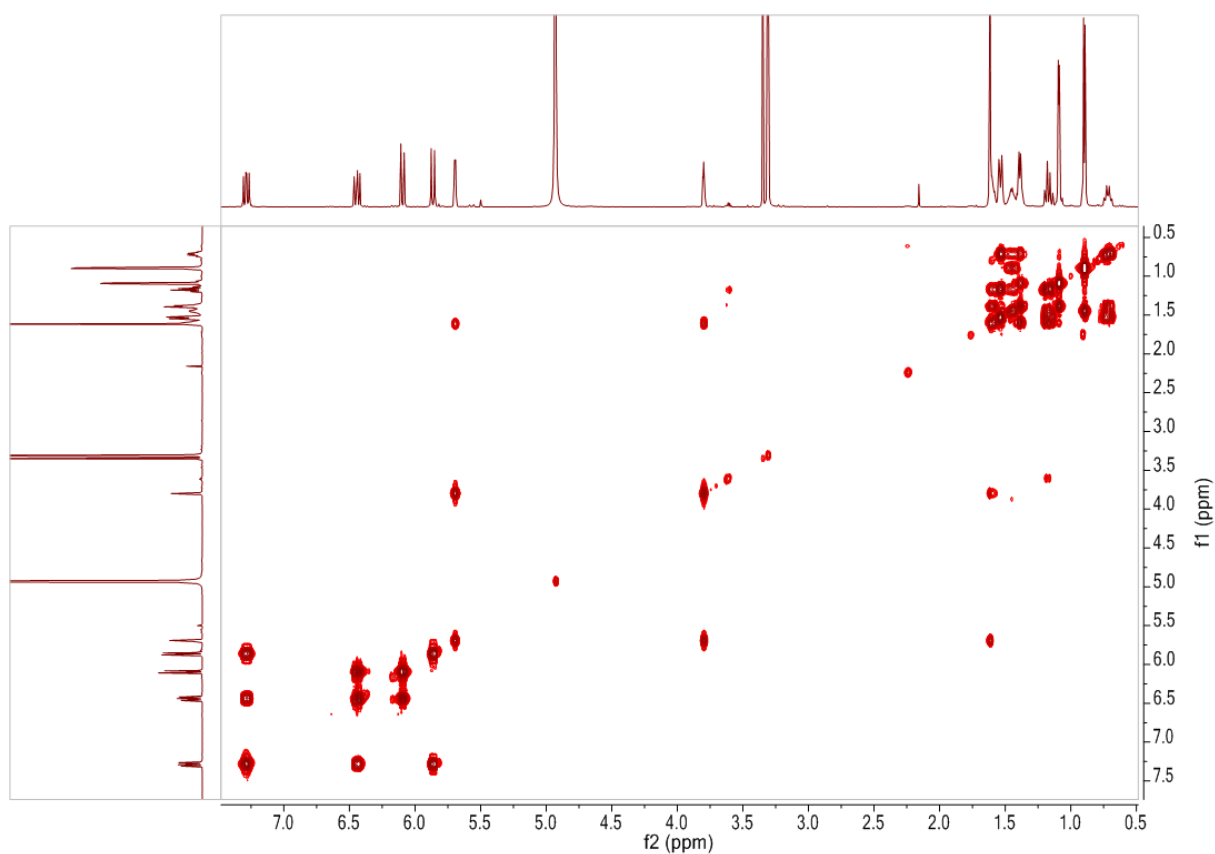

Figure S3: COSY spectrum of tanzawaic acid I (**1**) (CD<sub>3</sub>OD).

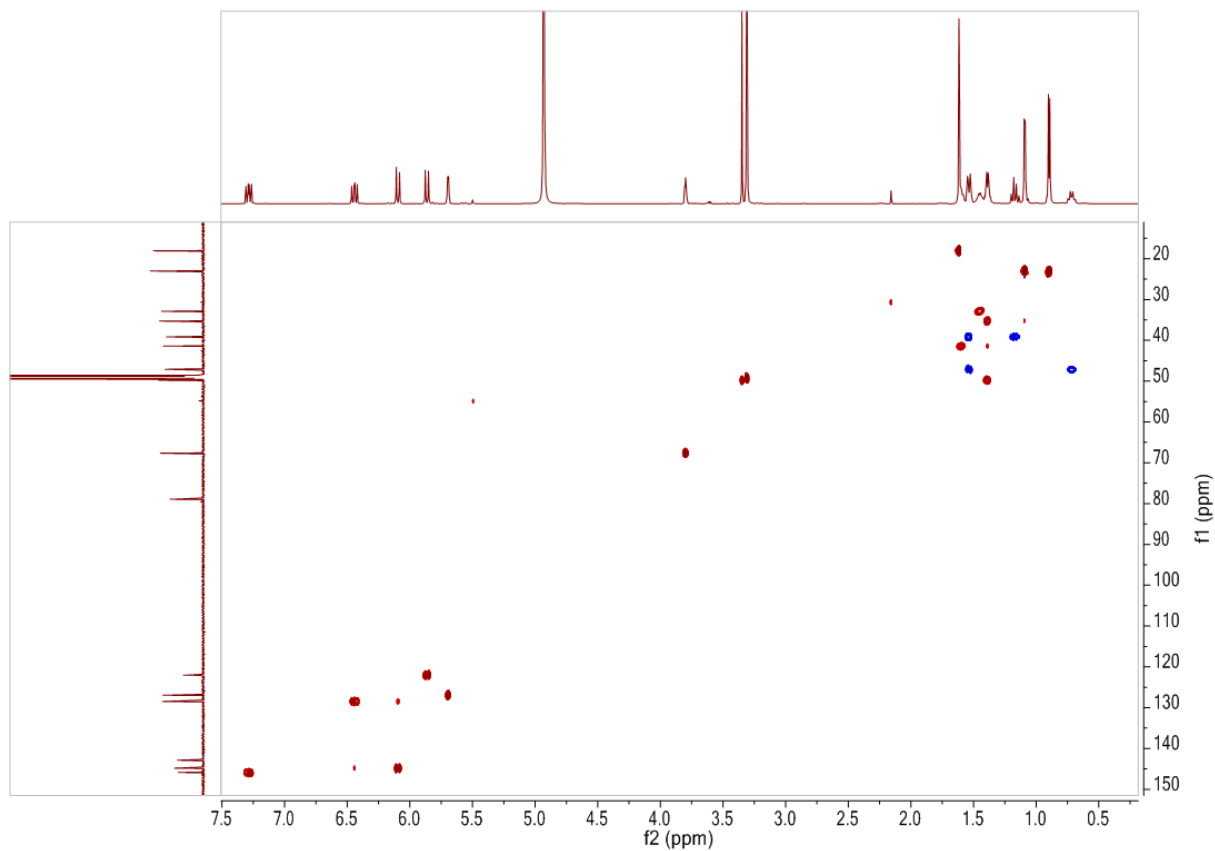

Figure S4: HSQC spectrum of tanzawaic acid I (**1**) (CD<sub>3</sub>OD).

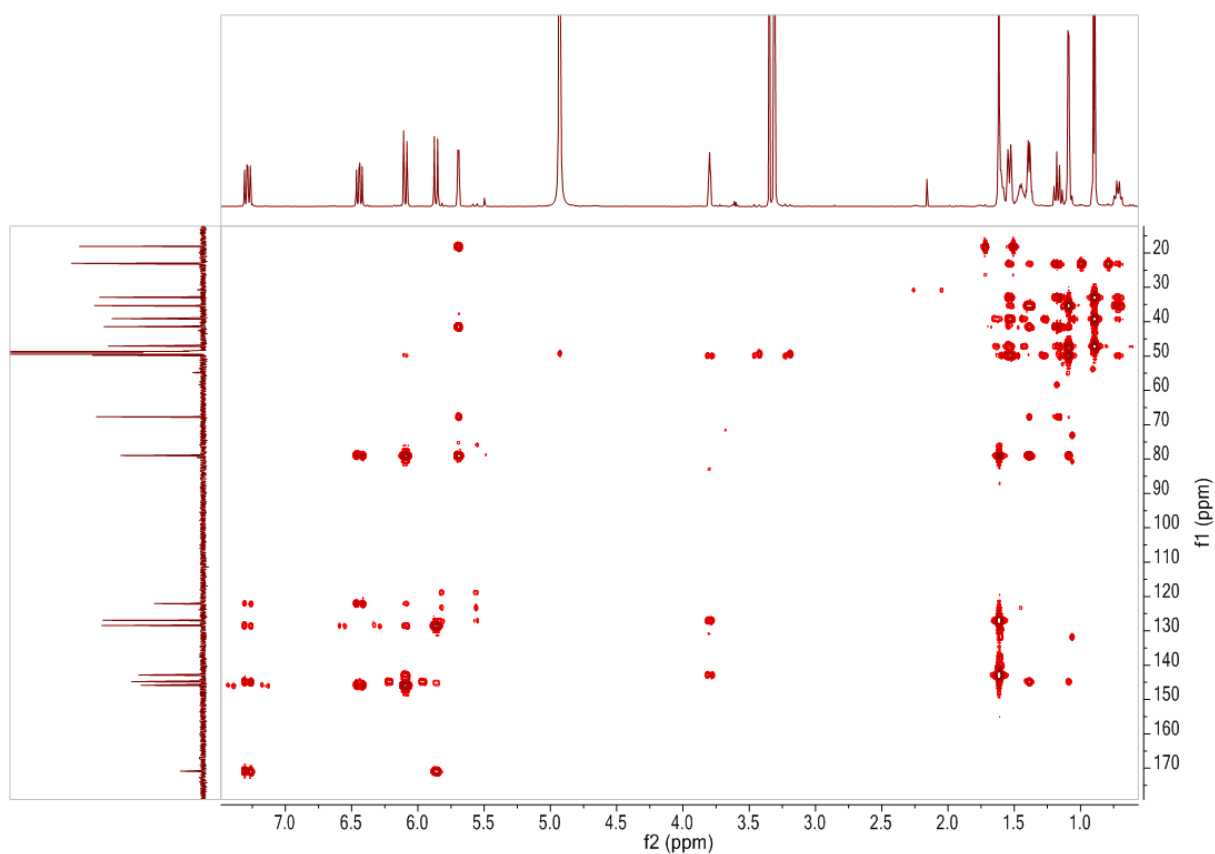

Figure S5: HMBC spectrum of tanzawaic acid I (**1**) (CD<sub>3</sub>OD).

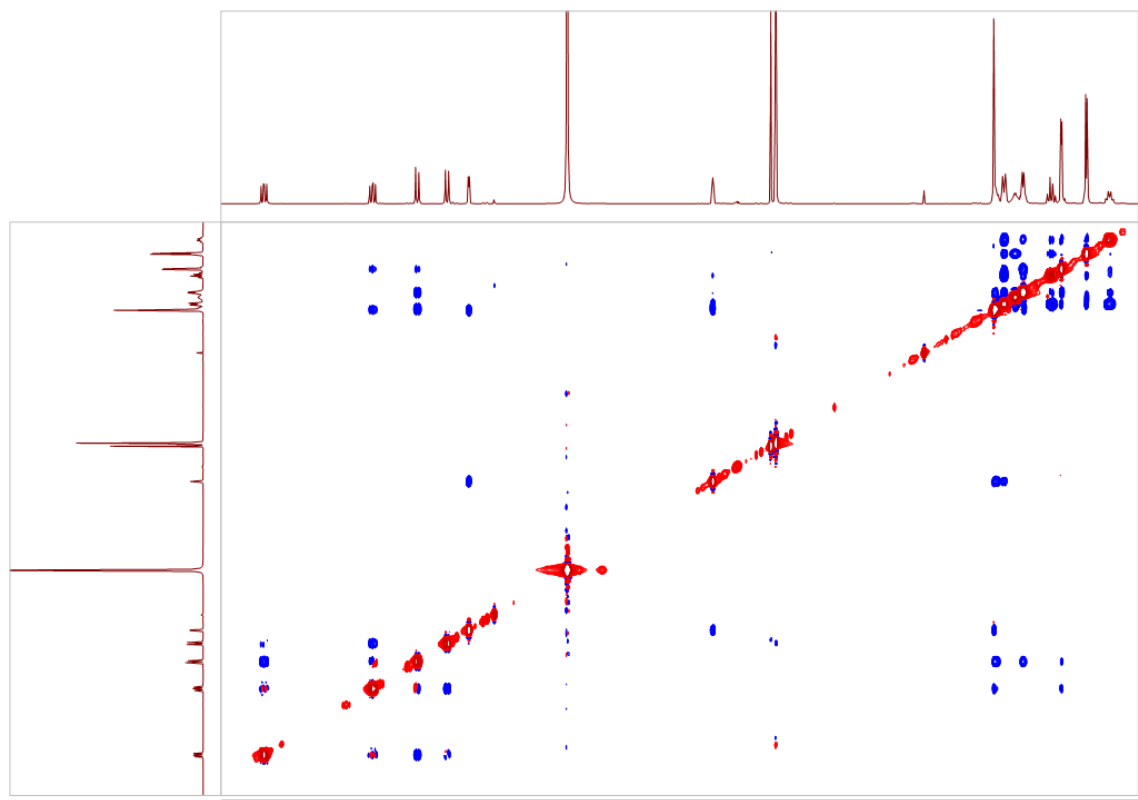

Figure S6: NOESY spectrum of tanzawaic acid I (**1**) (CD<sub>3</sub>OD).

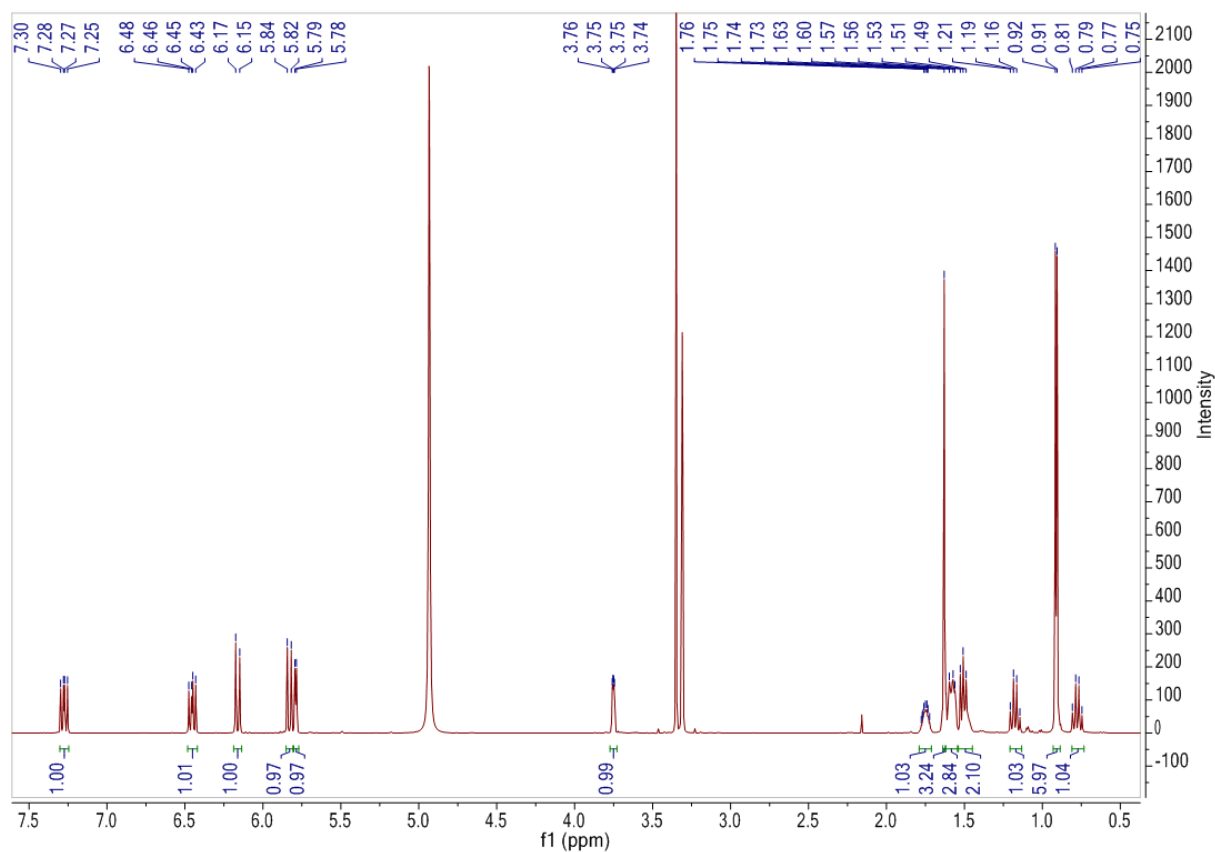

Figure S7:  $^1\text{H}$  NMR spectrum of tanzawaic acid J (**2**) ( $\text{CD}_3\text{OD}$ ).

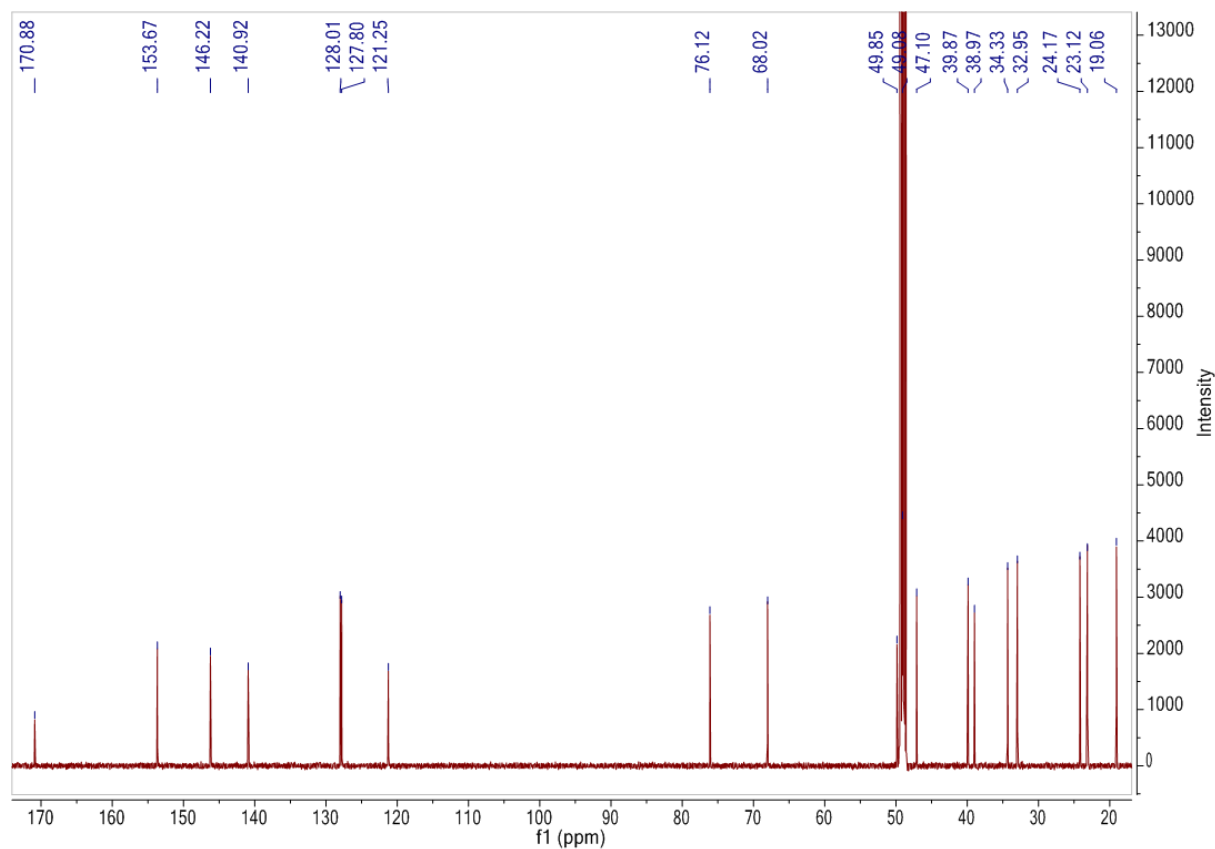

Figure S8:  $^{13}\text{C}$  NMR spectrum of tanzawaic acid J (**2**) ( $\text{CD}_3\text{OD}$ ).

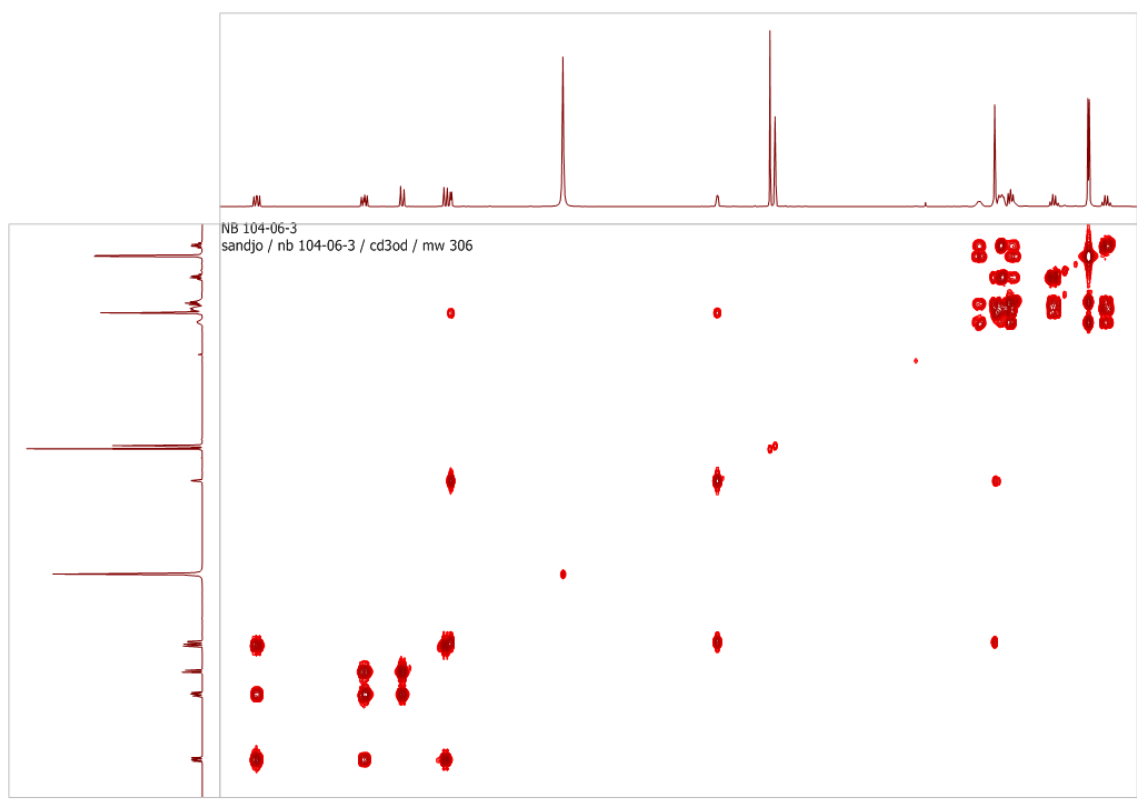

Figure S9: COSY spectrum of tanzawaic acid J (**2**) ( $\text{CD}_3\text{OD}$ ).

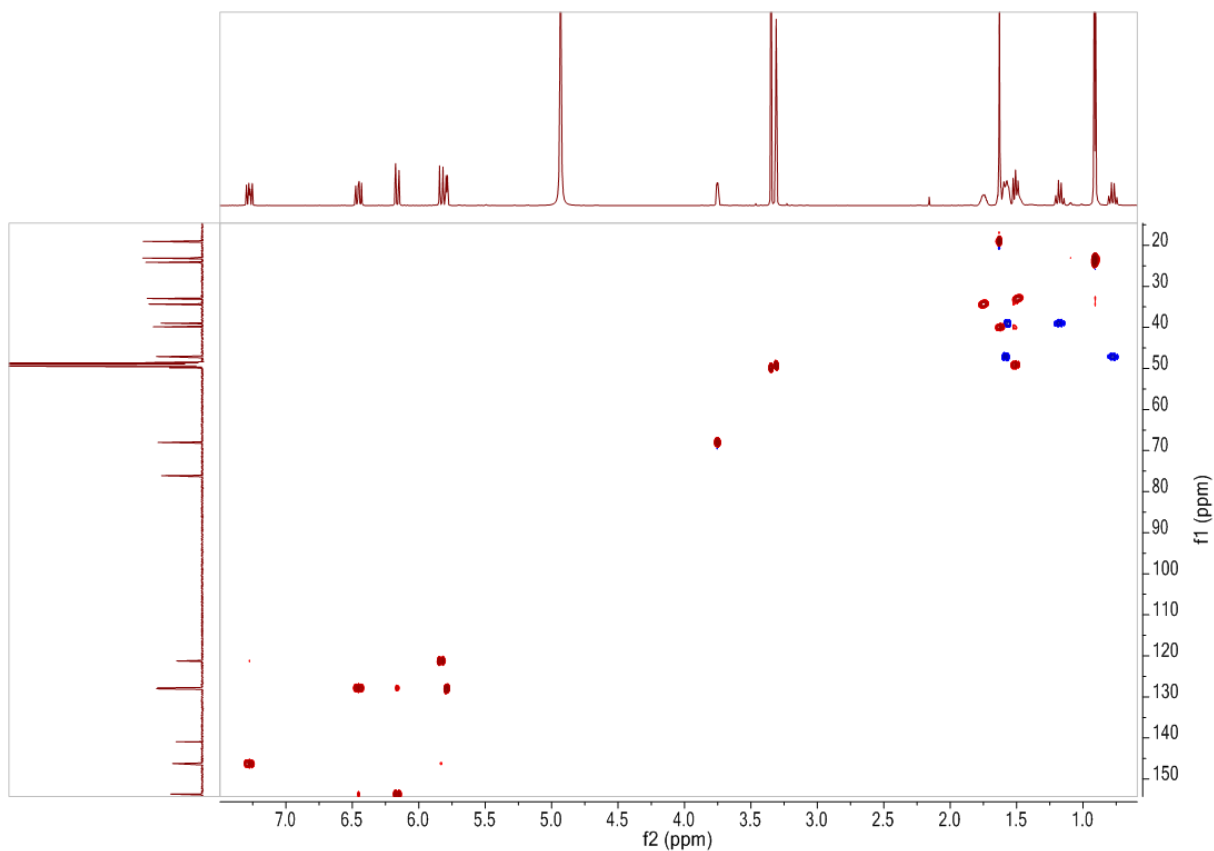

Figure S10: HSQC spectrum of tanzawaic acid J (**2**) ( $\text{CD}_3\text{OD}$ ).

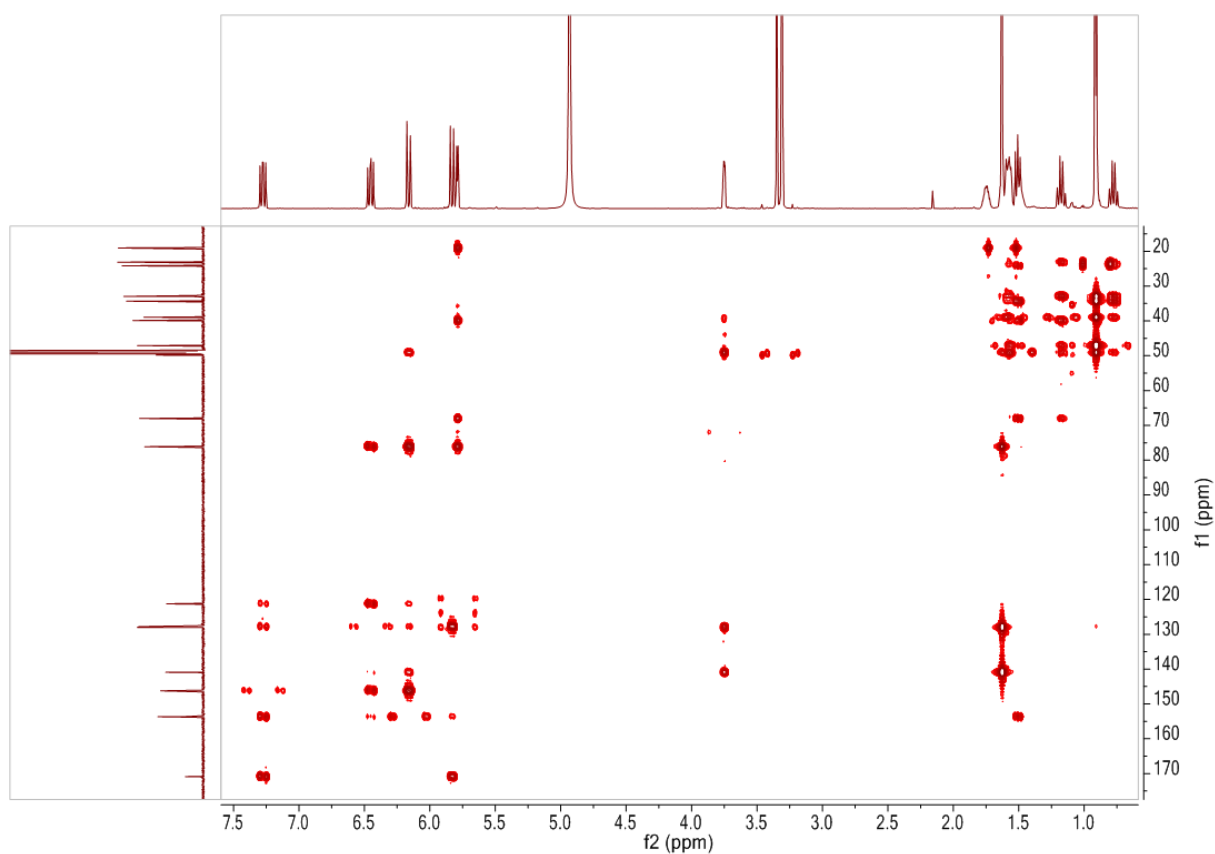

Figure S11: HMBC spectrum of tanzawaic acid J (**2**) ( $\text{CD}_3\text{OD}$ ).

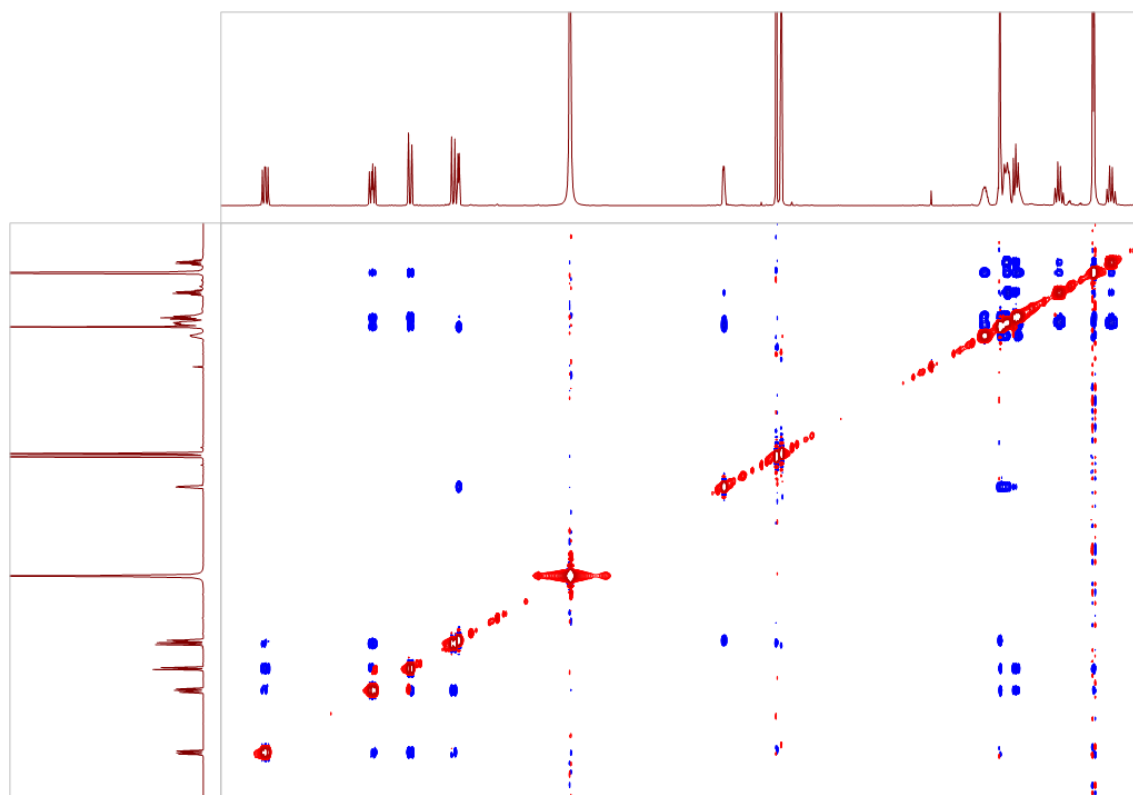

Figure S12: NOESY spectrum of tanzawaic acid J (**2**) ( $\text{CD}_3\text{OD}$ ).

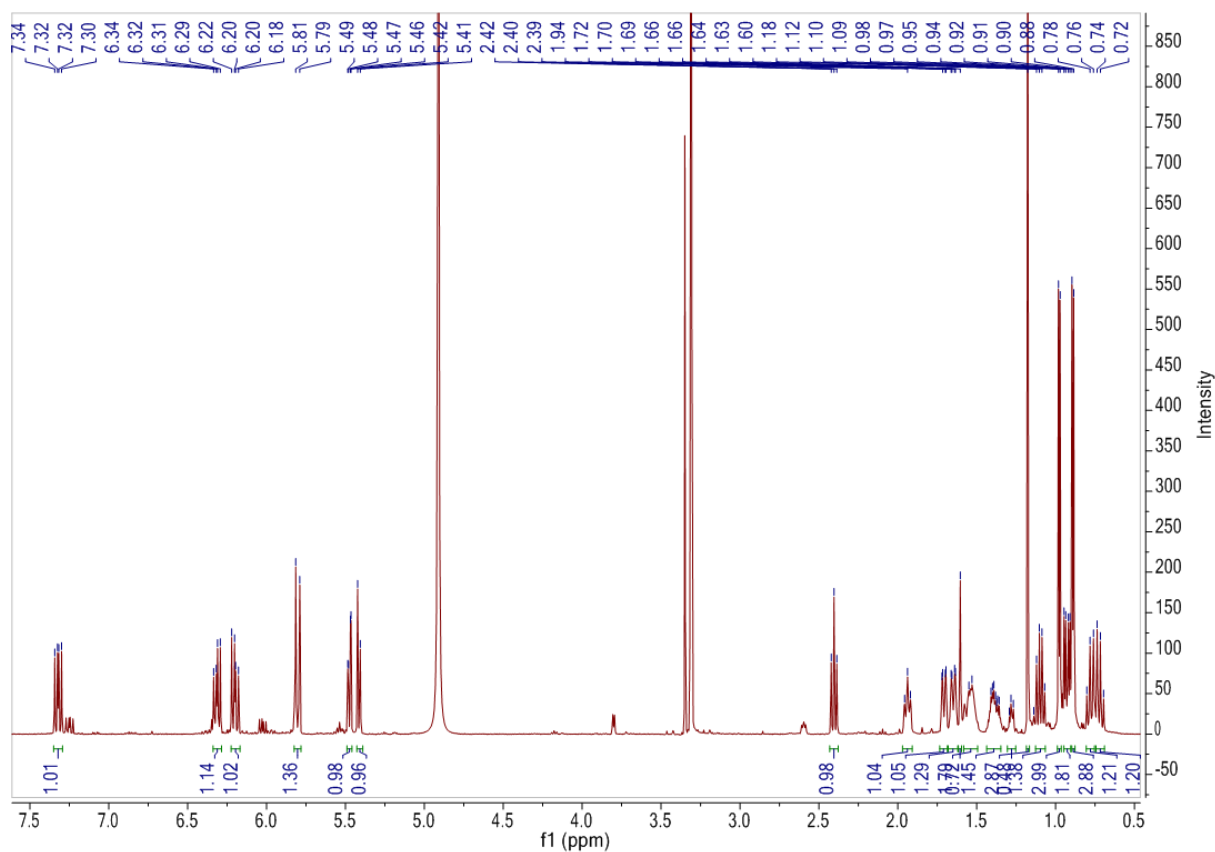

Figure S13:  $^1\text{H}$  NMR spectrum of tanzawaic acid K (**3**) ( $\text{CD}_3\text{OD}$ ).

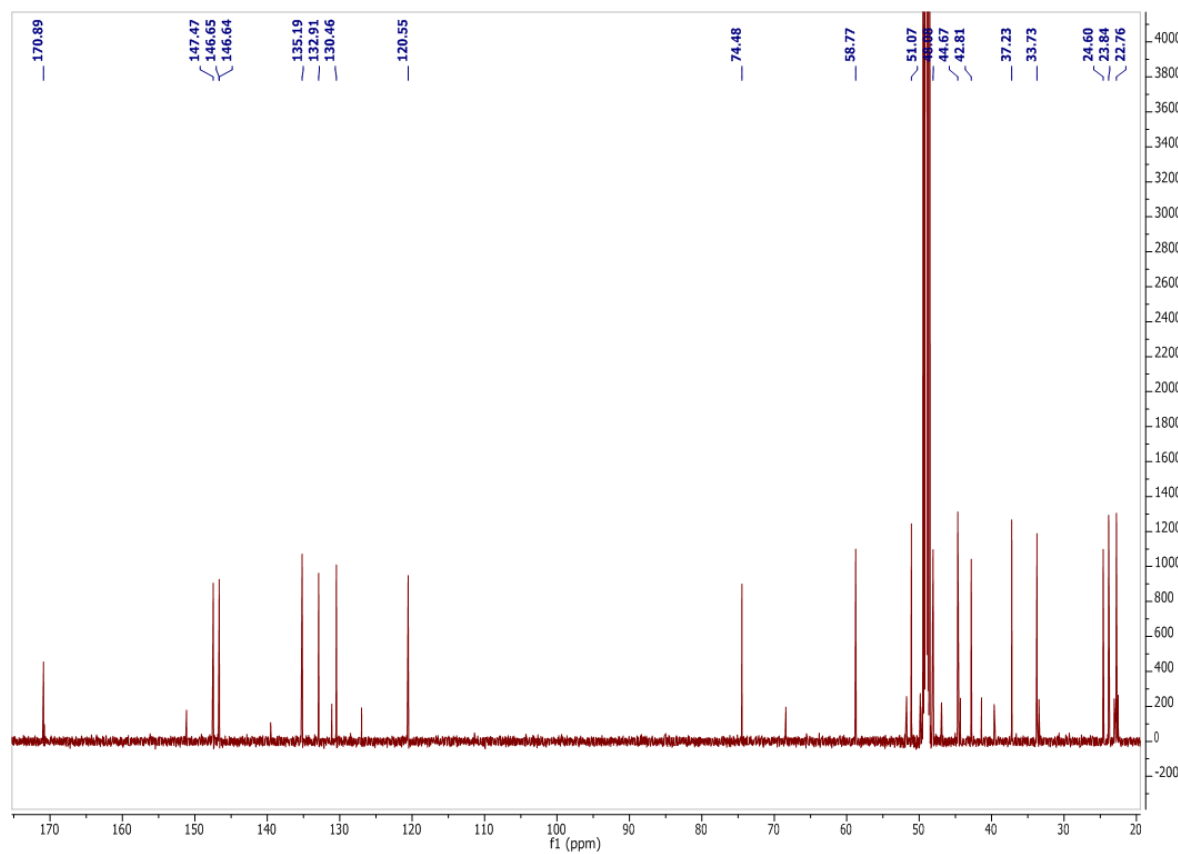

Figure S14:  $^{13}\text{C}$  NMR spectrum of tanzawaic acid K (**3**) ( $\text{CD}_3\text{OD}$ ).



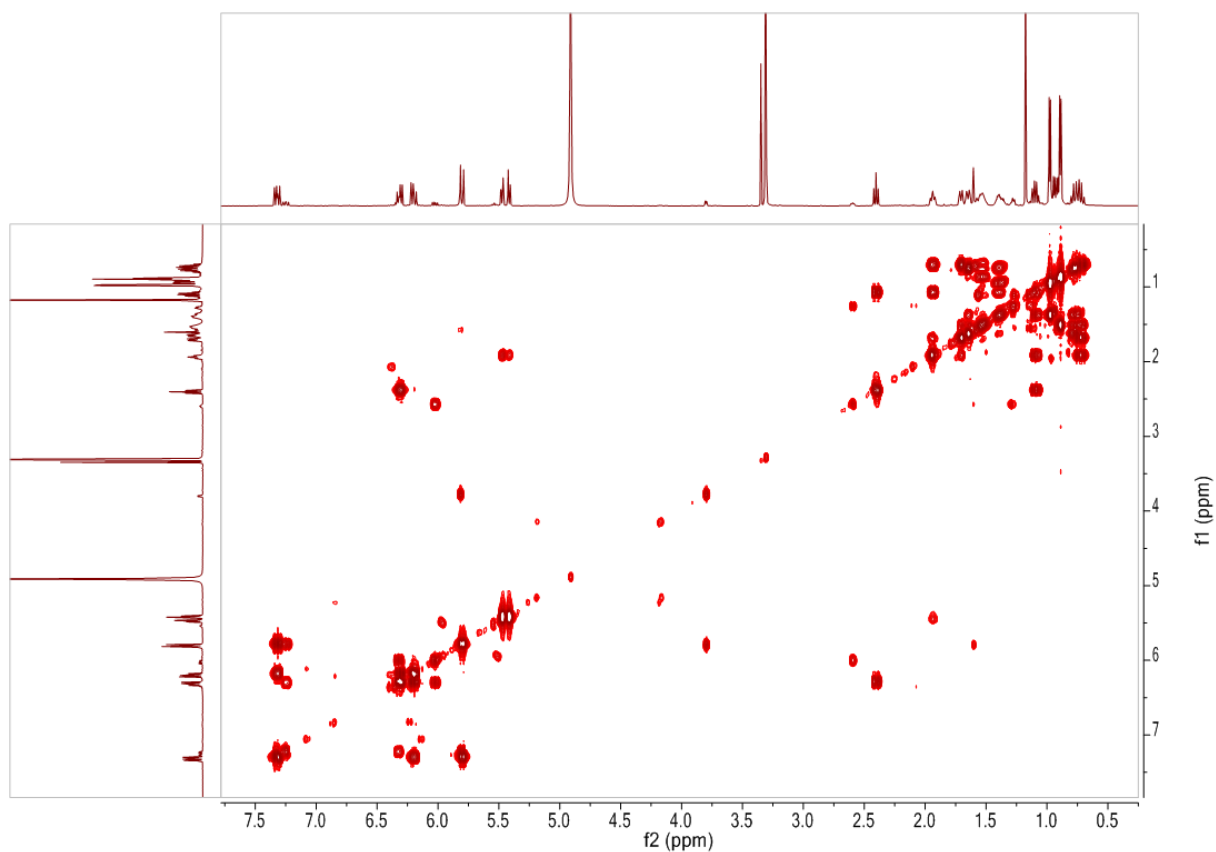

Figure S15: COSY spectrum of tanzawaic acid K (**3**) (CD<sub>3</sub>OD).

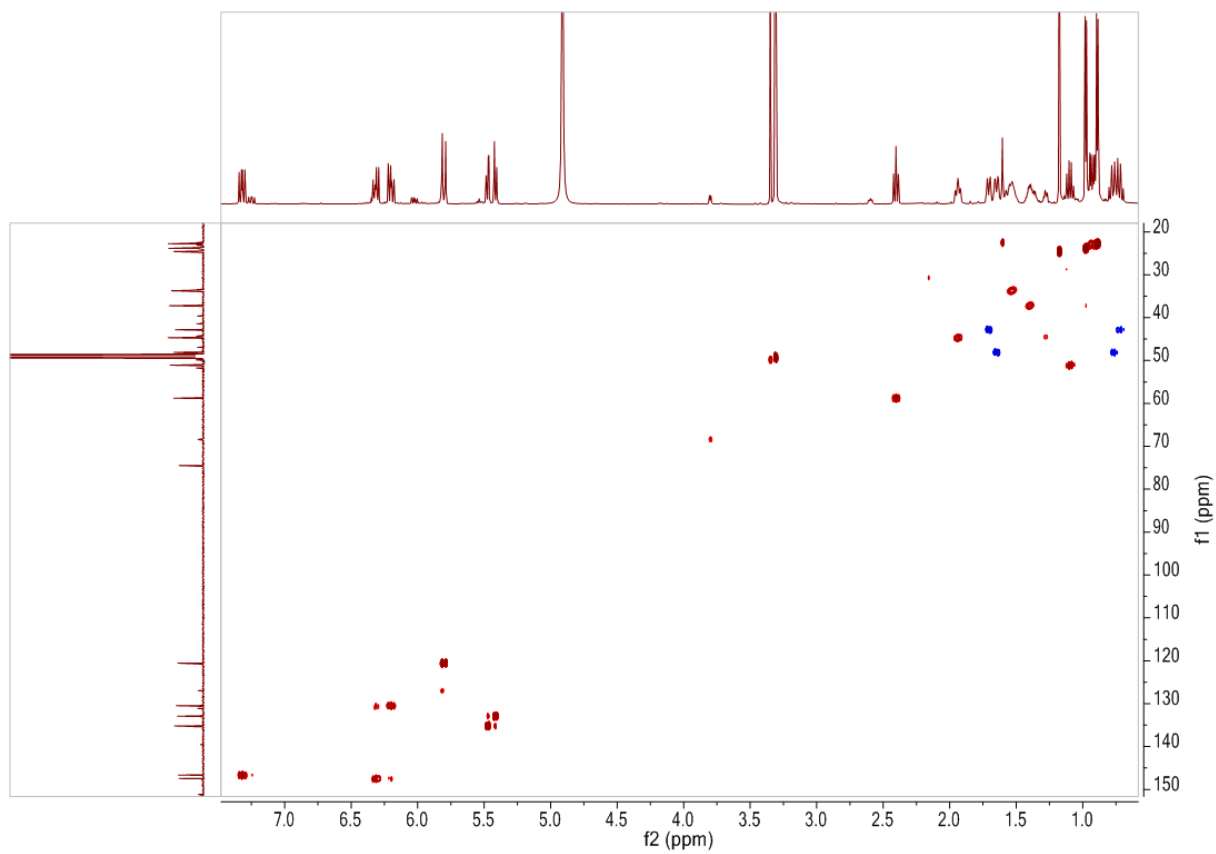

Figure S16: HSQC spectrum of tanzawaic acid K (**3**) (CD<sub>3</sub>OD).

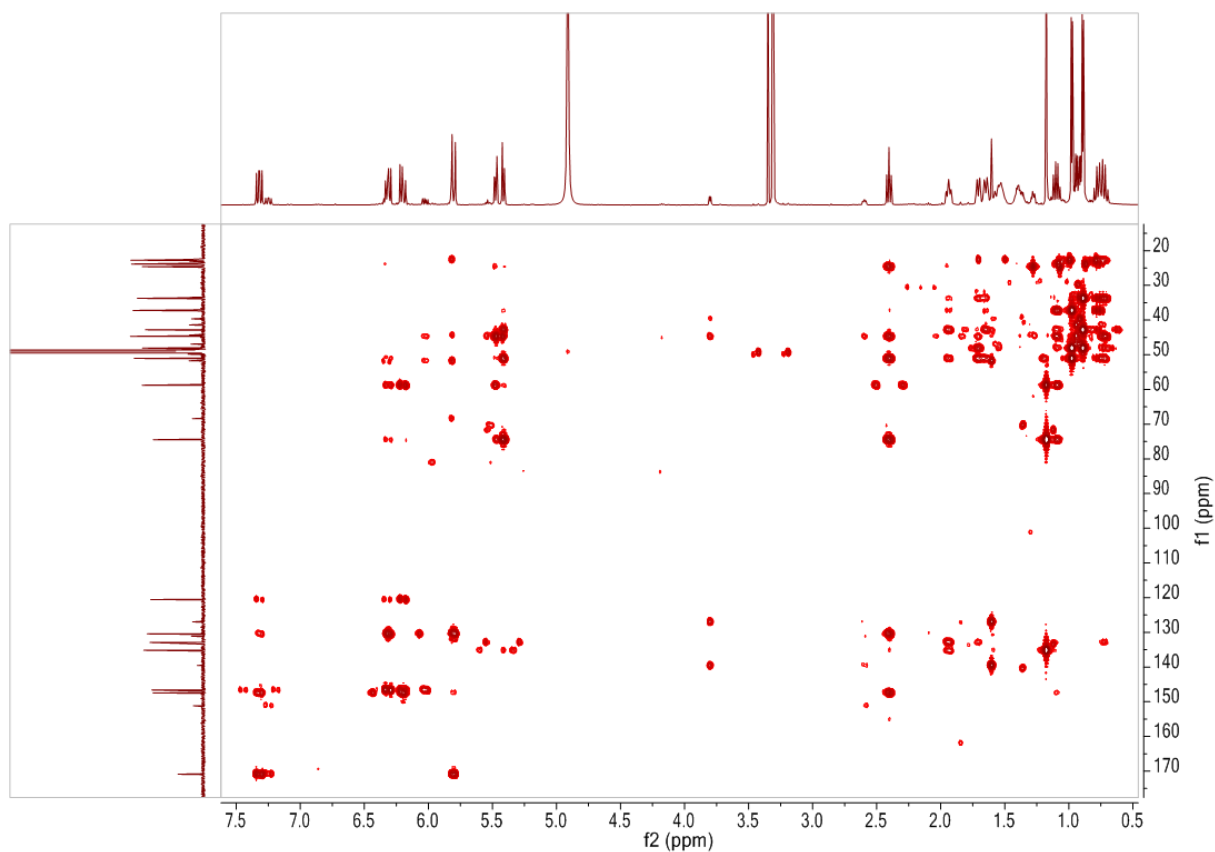

Figure S17: HMBC spectrum of tanzawaic acid K (**3**) (CD<sub>3</sub>OD).

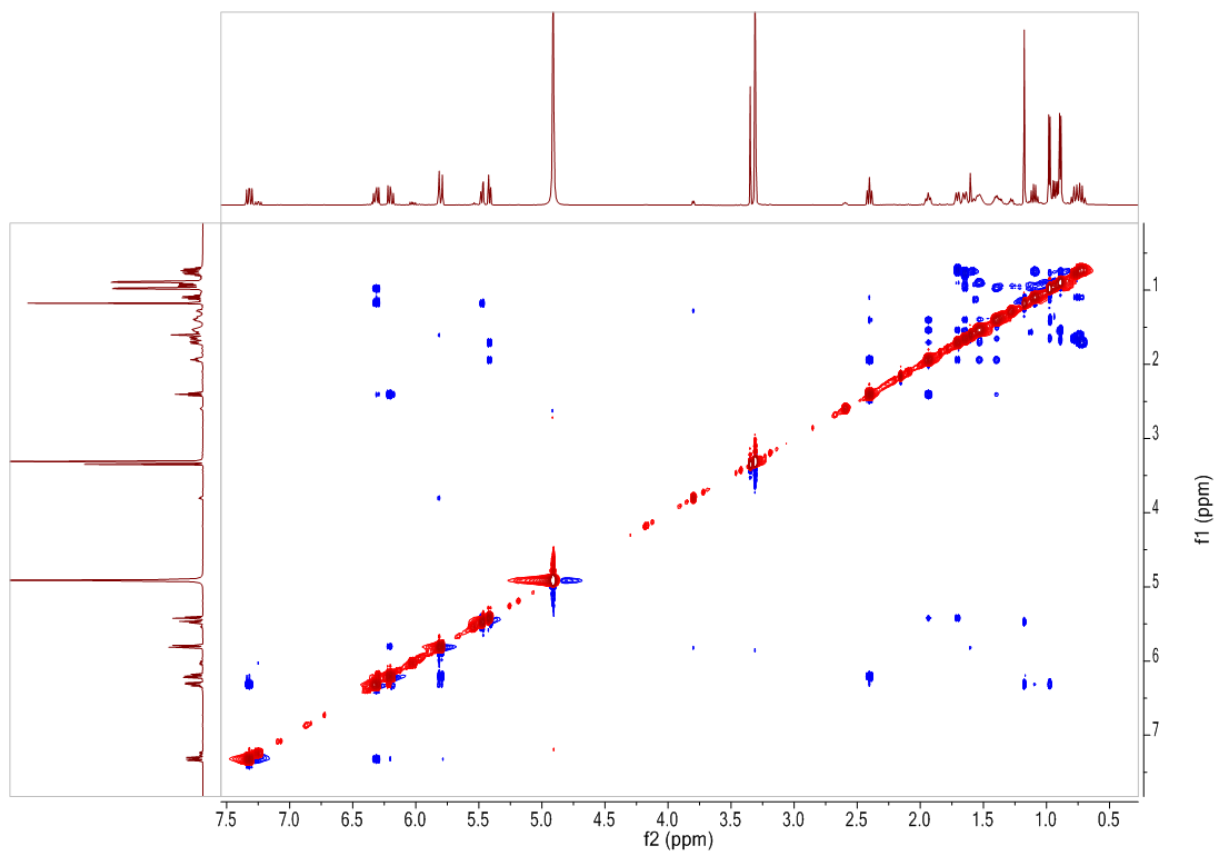

Figure S18: NOESY spectrum of tanzawaic acid K (**3**) (CD<sub>3</sub>OD).

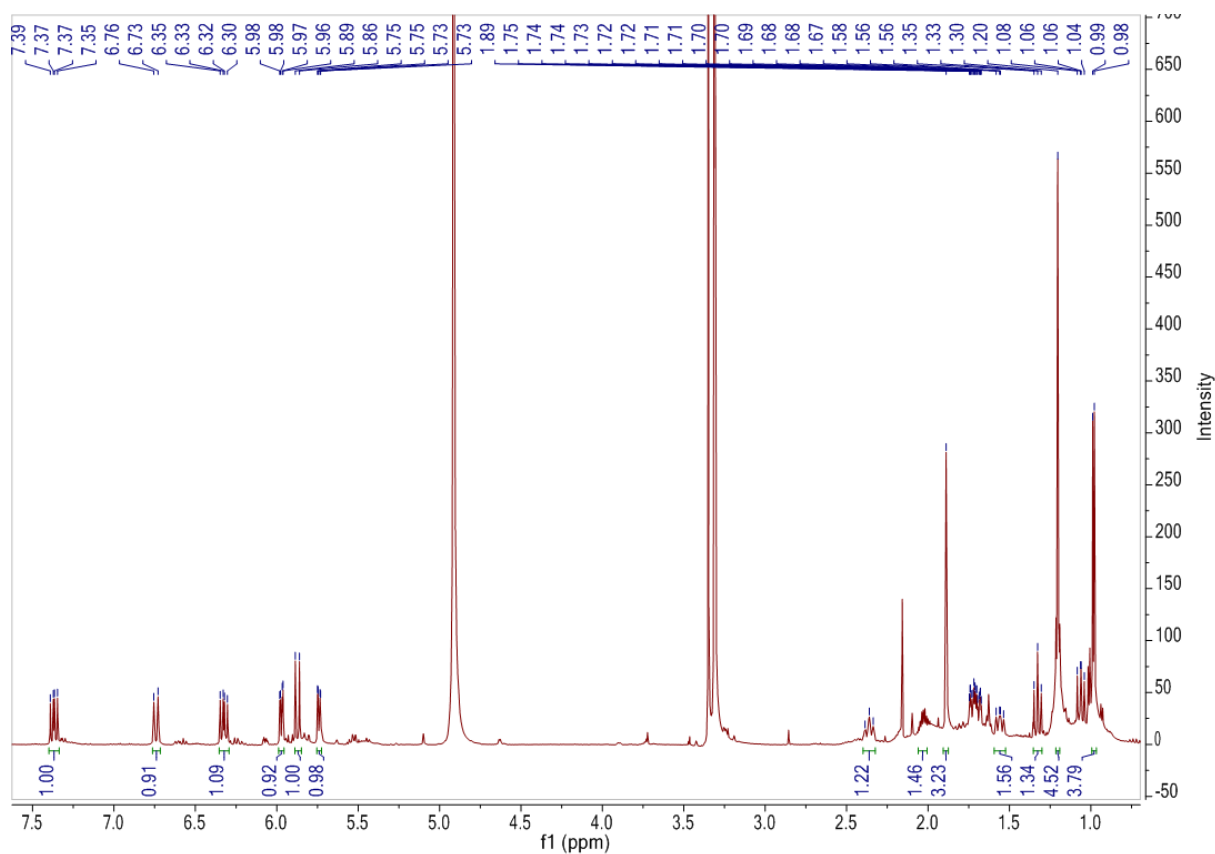

Figure S19:  $^1\text{H}$  NMR spectrum of tanzawaic acid L (**4**) ( $\text{CD}_3\text{OD}$ ).

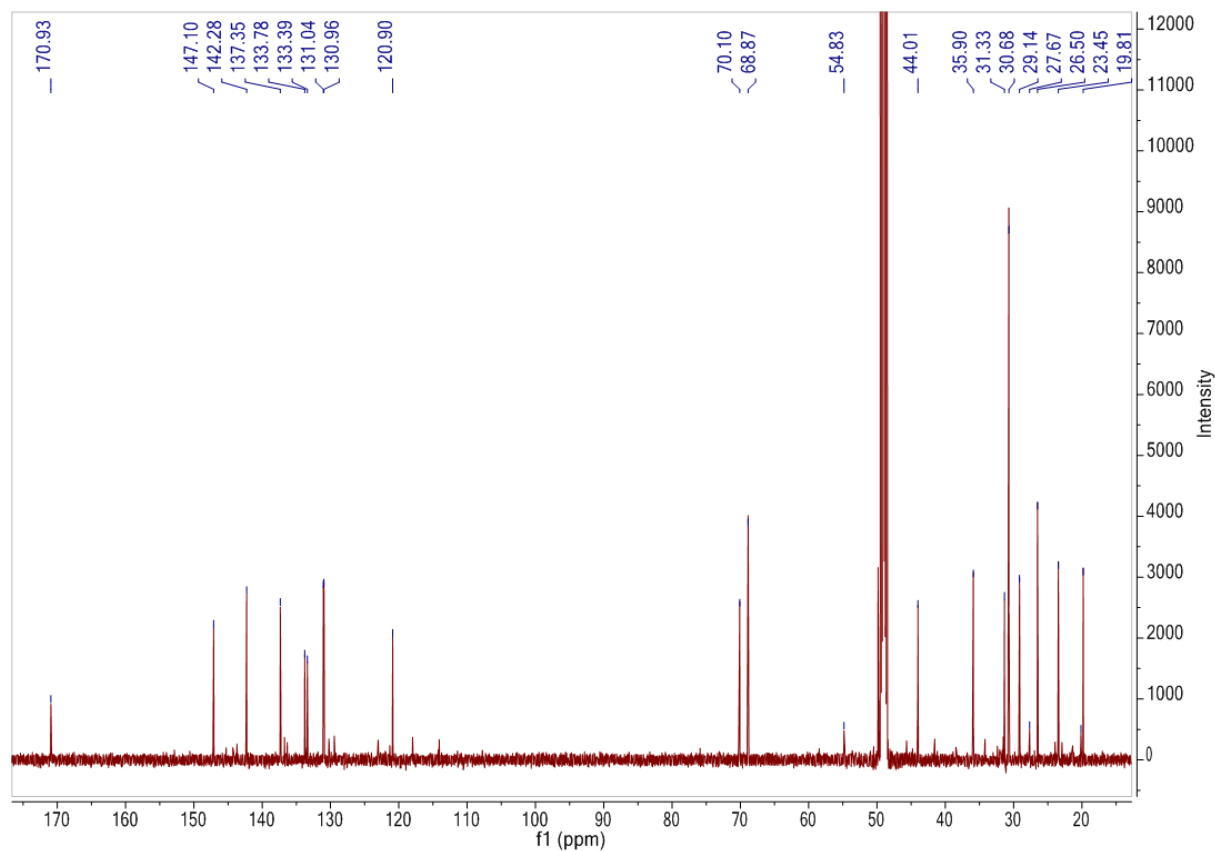

Figure S20:  $^{13}\text{C}$  NMR spectrum of tanzawaic acid L (**4**) ( $\text{CD}_3\text{OD}$ ).

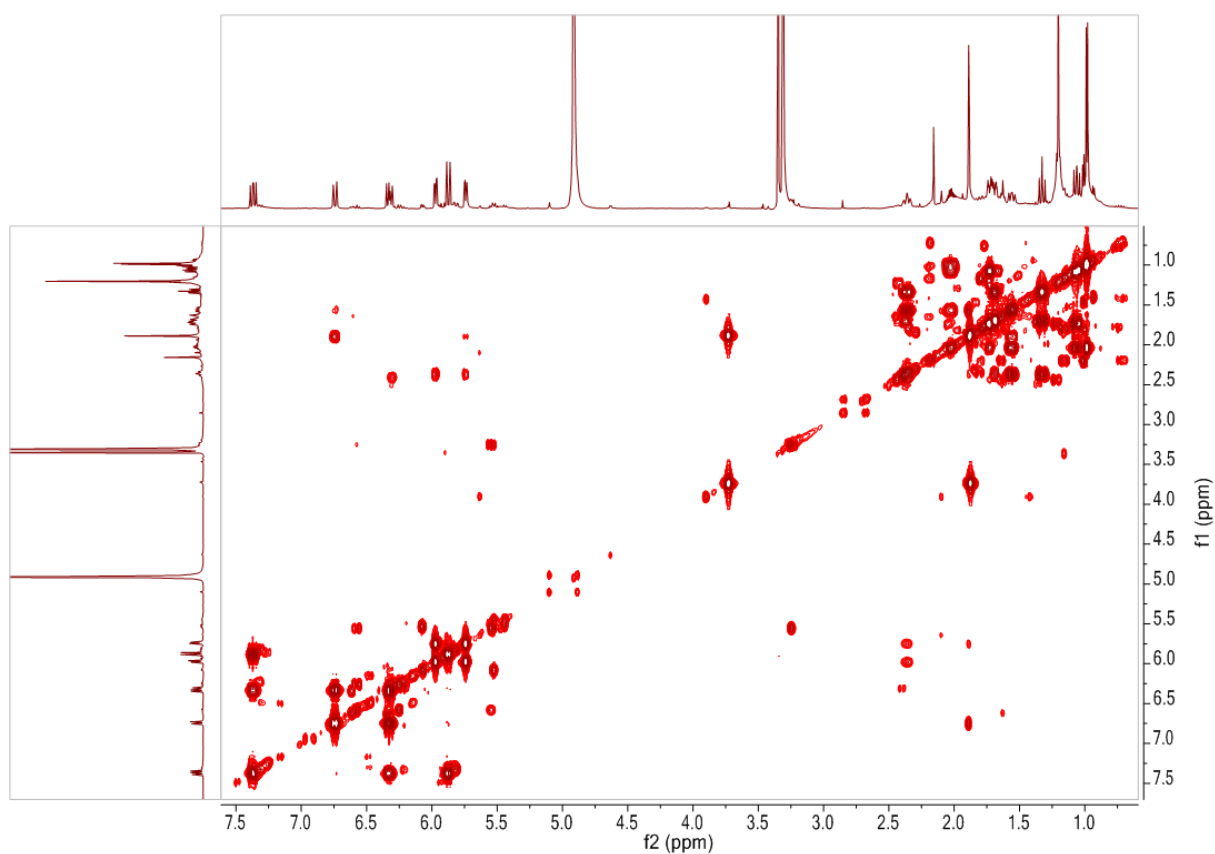

Figure S21: COSY spectrum of tanzawaic acid L (**4**) ( $\text{CD}_3\text{OD}$ ).

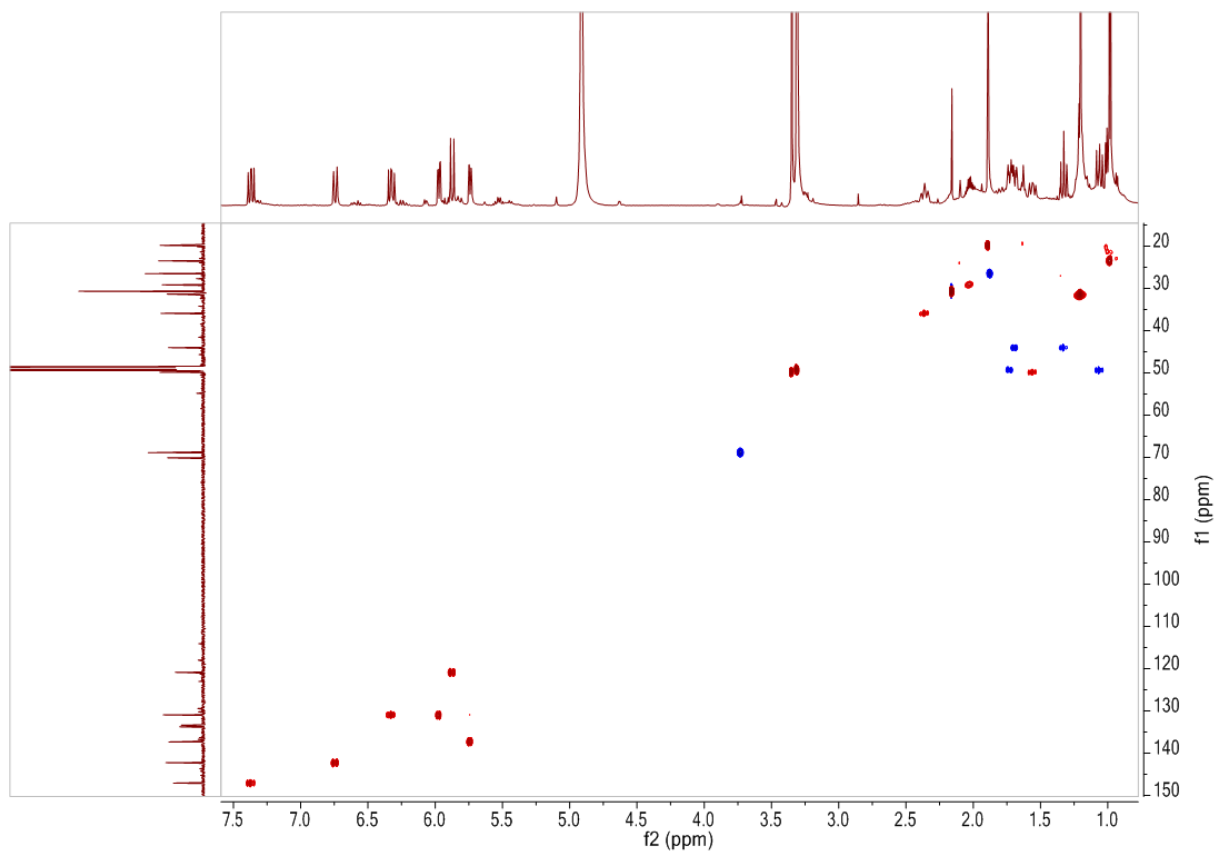

Figure S22: HSQC spectrum of tanzawaic acid L (**4**) ( $\text{CD}_3\text{OD}$ ).

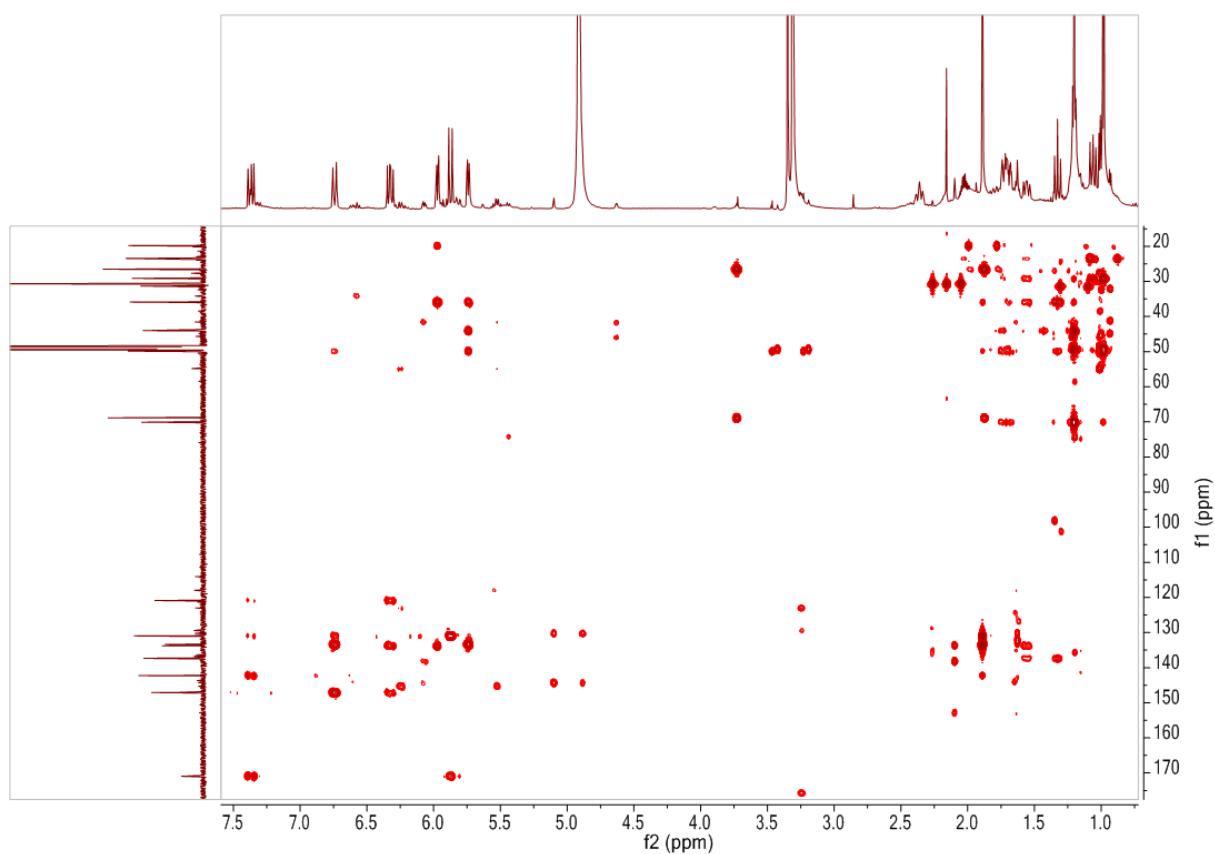

Figure S23: HMBC spectrum of tanzawaic acid L (**4**) (CD<sub>3</sub>OD).

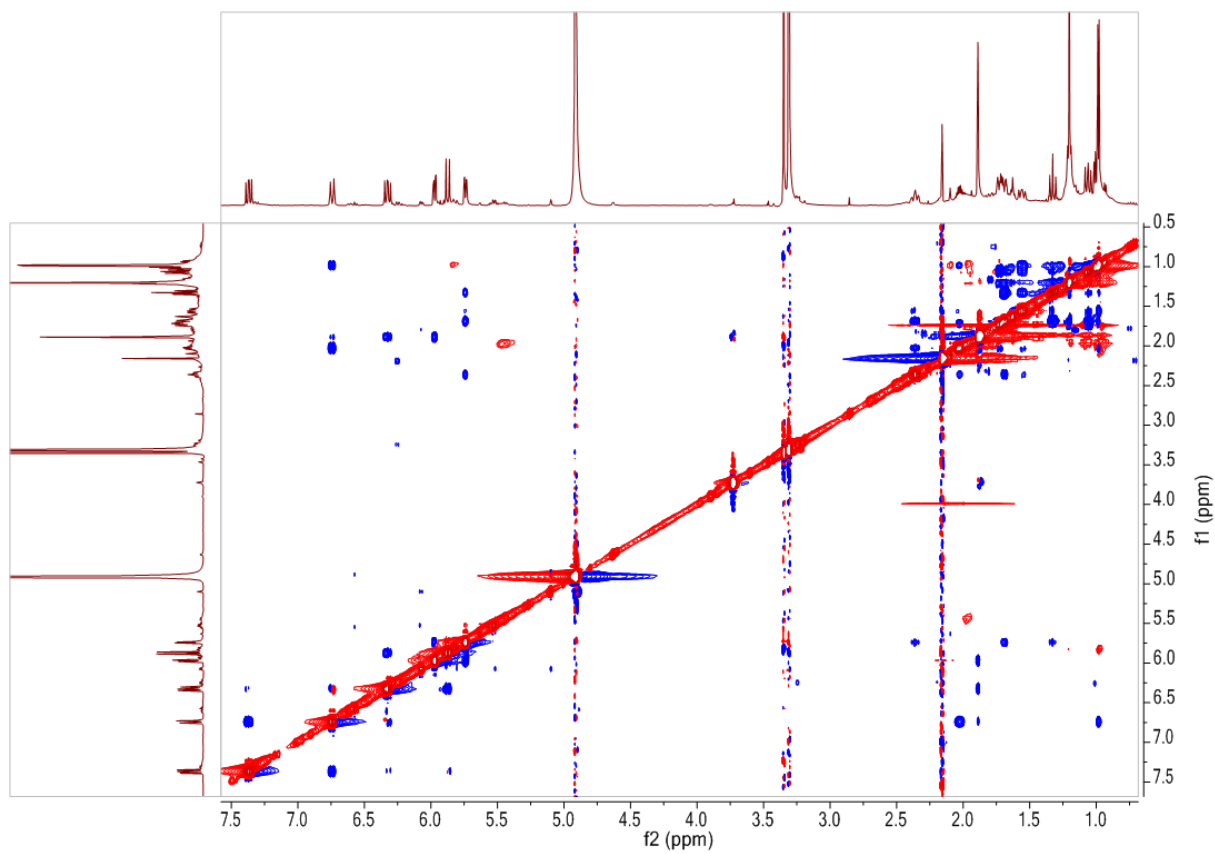

Figure S24: NOESY spectrum of tanzawaic acid L (**4**) (CD<sub>3</sub>OD).

### Crystal data for arohynapene A (5)

|                                                                                            |                                                               |
|--------------------------------------------------------------------------------------------|---------------------------------------------------------------|
| formula                                                                                    | $C_{18}H_{22}O_3$                                             |
| molecular weight                                                                           | 286.2 $g\text{mol}^{-1}$                                      |
| absorption                                                                                 | $\mu = 0.08\text{ mm}^{-1}$                                   |
| crystal size                                                                               | 0.2 x 0.2 x 0.6 $\text{mm}^3$ colourless block                |
| space group                                                                                | P 2 <sub>1</sub> 2 <sub>1</sub> 2 <sub>1</sub> (orthorhombic) |
| lattice parameters<br>(calculate from<br>9956 reflections with<br>2.3° < $\theta$ < 27.4°) | a = 8.7599(5) Å<br>b = 13.3019(8) Å<br>c = 13.6416(8) Å       |
| temperature                                                                                | -100°C                                                        |
| density                                                                                    | $d_{\text{Xray}} = 1.197\text{ gcm}^{-3}$                     |
| <u>Data Collection</u>                                                                     |                                                               |
| diffractometer                                                                             | Smart CCD                                                     |
| radiation                                                                                  | Mo-K $\alpha$ graphit monochromator                           |
| scan type                                                                                  | $\varphi, \omega$ -scans                                      |
| scan – width                                                                               | 0.5°                                                          |
| scan range                                                                                 | 2° ≤ $\theta$ < 28°                                           |
| number of reflections:<br>measured                                                         | -11 ≤ h ≤ 11 -17 ≤ k ≤ 17 -17 ≤ l ≤ 17<br>28907               |
| unique                                                                                     | 3779 ( $R_{\text{int}} = 0.0291$ )                            |
| observed                                                                                   | 3518 ( $ F /\sigma(F) > 4.0$ )                                |

### Data correction, structure solution and refinement

|                                    |                                                                                                                                                                                                                                                                                                                            |
|------------------------------------|----------------------------------------------------------------------------------------------------------------------------------------------------------------------------------------------------------------------------------------------------------------------------------------------------------------------------|
| Corrections                        | Lorentz and polarisation correction.                                                                                                                                                                                                                                                                                       |
| Structure solution                 | Program: SIR-97 (Direct methods)                                                                                                                                                                                                                                                                                           |
| Refinement                         | Program: SHELXL-97 (full matrix). 195 refined parameters,<br>weighting scheme:<br>$w = 1/[\sigma^2(F_o^2) + (0.0507 * P)^2 + 0.23 * P]$<br>with $(\text{Max}(F_o^2, 0) + 2 * F_c^2) / 3$ . H-atoms at calculated positions<br>and refined with isotropic displacement parameters, non H-<br>atoms refined anisotropically. |
| R-values                           | wR2 = 0.087 (R1 = 0.0324 for observed reflections, 0.0365<br>for all reflections)                                                                                                                                                                                                                                          |
| goodness of fit                    | S = 1.033                                                                                                                                                                                                                                                                                                                  |
| maximum deviation<br>of parameters | 0.001 * e.s.d                                                                                                                                                                                                                                                                                                              |

maximum peak height in  
diff. Fourier synthesis

0.2, -0.18 eÅ<sup>-3</sup>

final coordinates and equivalent displacement parameters ( $\text{\AA}^2$ )

$$U_{\text{eq}} = (1/3) * \sum_{ij} a_i * a_j * \mathbf{a}_i \cdot \mathbf{a}_j$$

| Atom | X         | Y          | Z          | $U_{\text{eq}}$ |
|------|-----------|------------|------------|-----------------|
| O1   | 0.5817(1) | 1.16316(6) | 0.57929(8) | 0.0338(3)       |
| O2   | 0.3349(1) | 1.18042(7) | 0.54487(9) | 0.0414(3)       |
| O3   | 0.5949(1) | 0.36088(6) | 0.57425(7) | 0.0299(3)       |
| C1   | 0.4466(2) | 1.12719(9) | 0.55665(9) | 0.0264(3)       |
| C2   | 0.4384(2) | 1.01670(9) | 0.54592(9) | 0.0281(3)       |
| C3   | 0.5571(1) | 0.95547(8) | 0.53585(9) | 0.0241(3)       |
| C4   | 0.5360(1) | 0.84869(8) | 0.51562(9) | 0.0249(3)       |
| C5   | 0.6438(1) | 0.78568(9) | 0.4857(1)  | 0.0260(3)       |
| C6   | 0.6106(1) | 0.68072(9) | 0.45245(9) | 0.0231(3)       |
| C7   | 0.5684(1) | 0.60376(8) | 0.51880(8) | 0.0217(3)       |
| C8   | 0.5727(2) | 0.62274(8) | 0.62966(9) | 0.0241(3)       |
| C9   | 0.5121(2) | 0.5342(1)  | 0.69151(9) | 0.0301(4)       |
| C10  | 0.3960(2) | 0.46702(9) | 0.63990(9) | 0.0279(3)       |
| C11  | 0.4682(1) | 0.42578(8) | 0.54645(9) | 0.0243(3)       |
| C12  | 0.5223(1) | 0.51026(8) | 0.48084(9) | 0.0229(3)       |
| C13  | 0.5245(2) | 0.49394(9) | 0.3796(1)  | 0.0290(4)       |
| C14  | 0.5724(2) | 0.5683(1)  | 0.3156(1)  | 0.0315(4)       |
| C15  | 0.6150(2) | 0.66257(9) | 0.35063(9) | 0.0277(4)       |
| C16  | 0.6599(2) | 0.7442(1)  | 0.2788(1)  | 0.0399(5)       |
| C17  | 0.3371(2) | 0.3835(1)  | 0.7073(1)  | 0.0383(4)       |
| C18  | 0.7342(2) | 0.6489(1)  | 0.6657(1)  | 0.0321(4)       |

anisotropic displacement parameters

| Atom | $U_{11}$  | $U_{22}$  | $U_{33}$  | $U_{12}$   | $U_{13}$   | $U_{23}$   |
|------|-----------|-----------|-----------|------------|------------|------------|
| O1   | 0.0312(5) | 0.0137(4) | 0.0566(6) | -0.0018(3) | -0.0037(5) | 0.0030(4)  |
| O2   | 0.0337(5) | 0.0196(4) | 0.0708(8) | 0.0039(4)  | -0.0125(5) | -0.0066(5) |
| O3   | 0.0299(5) | 0.0166(4) | 0.0433(5) | 0.0031(3)  | 0.0028(4)  | 0.0037(4)  |
| C1   | 0.0299(6) | 0.0169(5) | 0.0324(6) | 0.0002(5)  | -0.0010(5) | -0.0009(5) |
| C2   | 0.0285(6) | 0.0174(5) | 0.0383(7) | -0.0026(5) | -0.0003(5) | -0.0037(5) |
| C3   | 0.0268(6) | 0.0168(5) | 0.0287(6) | -0.0022(5) | 0.0003(5)  | 0.0014(4)  |
| C4   | 0.0263(6) | 0.0158(5) | 0.0326(6) | -0.0016(4) | -0.0017(5) | 0.0001(4)  |
| C5   | 0.0265(6) | 0.0166(5) | 0.0348(6) | -0.0009(4) | 0.0008(5)  | 0.0034(5)  |
| C6   | 0.0232(5) | 0.0155(5) | 0.0307(6) | 0.0030(4)  | 0.0001(5)  | -0.0001(4) |
| C7   | 0.0218(5) | 0.0157(5) | 0.0275(5) | 0.0033(4)  | 0.0005(5)  | -0.0010(4) |
| C8   | 0.0309(6) | 0.0156(5) | 0.0257(5) | 0.0014(5)  | 0.0000(5)  | -0.0026(4) |
| C9   | 0.0418(8) | 0.0215(6) | 0.0270(6) | -0.0008(5) | -0.0009(5) | 0.0013(5)  |
| C10  | 0.0312(6) | 0.0197(5) | 0.0328(6) | 0.0016(5)  | 0.0036(5)  | 0.0029(5)  |
| C11  | 0.0256(6) | 0.0149(5) | 0.0324(6) | -0.0001(4) | -0.0008(5) | -0.0002(4) |
| C12  | 0.0241(6) | 0.0165(5) | 0.0281(6) | 0.0018(4)  | -0.0005(5) | -0.0009(4) |
| C13  | 0.0350(7) | 0.0206(6) | 0.0314(6) | 0.0010(5)  | -0.0031(5) | -0.0052(5) |
| C14  | 0.0387(7) | 0.0299(6) | 0.0259(6) | 0.0044(6)  | -0.0009(5) | -0.0030(5) |



|     |           |           |           |            |            |            |
|-----|-----------|-----------|-----------|------------|------------|------------|
| C15 | 0.0302(6) | 0.0238(6) | 0.0290(6) | 0.0041(5)  | 0.0015(5)  | 0.0042(5)  |
| C16 | 0.0520(9) | 0.0332(8) | 0.0346(7) | -0.0016(7) | 0.0050(7)  | 0.0085(6)  |
| C17 | 0.0460(9) | 0.0292(7) | 0.0398(8) | -0.0065(6) | 0.0090(7)  | 0.0043(6)  |
| C18 | 0.0363(7) | 0.0292(7) | 0.0308(7) | -0.0020(5) | -0.0053(5) | -0.0019(6) |

final coordinates and isotropic displacement parameters ( $\text{\AA}^2$ ) for H- atoms

| Atom | X       | Y       | Z       | $U_{\text{iso}}$ |
|------|---------|---------|---------|------------------|
| H1O  | 0.57874 | 1.22627 | 0.57846 | 0.0507           |
| H3O  | 0.66110 | 0.36132 | 0.52969 | 0.0449           |
| H2   | 0.33979 | 0.98697 | 0.54627 | 0.0337           |
| H3   | 0.65758 | 0.98167 | 0.54192 | 0.0289           |
| H4   | 0.43639 | 0.82195 | 0.52464 | 0.0299           |
| H5   | 0.74669 | 0.80822 | 0.48537 | 0.0312           |
| H8   | 0.50599 | 0.68210 | 0.64332 | 0.0289           |
| H9A  | 0.59978 | 0.49226 | 0.71200 | 0.0361           |
| H9B  | 0.46441 | 0.56162 | 0.75164 | 0.0361           |
| H10  | 0.30703 | 0.50975 | 0.62061 | 0.0335           |
| H11  | 0.39059 | 0.38497 | 0.51034 | 0.0292           |
| H13  | 0.49266 | 0.43078 | 0.35430 | 0.0348           |
| H14  | 0.57614 | 0.55496 | 0.24721 | 0.0378           |
| H16A | 0.64860 | 0.71903 | 0.21167 | 0.0599           |
| H16B | 0.76644 | 0.76351 | 0.29013 | 0.0599           |
| H16C | 0.59382 | 0.80286 | 0.28811 | 0.0599           |
| H17A | 0.42282 | 0.34143 | 0.72855 | 0.0575           |
| H17B | 0.26301 | 0.34207 | 0.67171 | 0.0575           |
| H17C | 0.28780 | 0.41346 | 0.76478 | 0.0575           |
| H18C | 0.80499 | 0.59524 | 0.64687 | 0.0482           |
| H18B | 0.73342 | 0.65575 | 0.73725 | 0.0482           |
| H18A | 0.76707 | 0.71241 | 0.63605 | 0.0482           |

### Crystal data for tanzawaic acid E

|                                       |                                                    |         |                |
|---------------------------------------|----------------------------------------------------|---------|----------------|
| formula                               | $\text{C}_{18}\text{H}_{26}\text{O}_3$             |         |                |
| molecular weight                      | 290.40 $\text{g mol}^{-1}$                         |         |                |
| absorption                            | $\mu = 0.61 \text{ mm}^{-1}$                       |         |                |
| crystal size                          | 0.16 x 0.254 x 0.44 $\text{mm}^3$ colourless block |         |                |
| space group                           | P $2_1 2_1 2_1$ (orthorhombic)                     |         |                |
| lattice parameters                    | a = 8.8767(4) $\text{\AA}$                         |         |                |
| (calculate from                       | b = 12.3684(7) $\text{\AA}$                        |         |                |
| 16443 reflections with                | c = 15.3494(9) $\text{\AA}$                        |         |                |
| $2.88^\circ < \theta < 68.05^\circ$ ) | $V = 1685.22(15) \text{\AA}^3$                     | $z = 4$ | $F(000) = 632$ |
| temperature                           | -80°C                                              |         |                |
| density                               | $d_{\text{xray}} = 1.145 \text{ g cm}^{-3}$        |         |                |

### data collection

|                        |                                                               |
|------------------------|---------------------------------------------------------------|
| diffractometer         | STOE IPDS2T                                                   |
| radiation              | Cu-K $\alpha$                                                 |
| Scan – type            | $\omega$ scans                                                |
| Scan – width           | 1°                                                            |
| scan range             | $2^\circ \leq \theta < 68^\circ$                              |
|                        | $-13 \leq h \leq 14$ $-9 \leq k \leq 10$ $-17 \leq l \leq 18$ |
| number of reflections: |                                                               |
| measured               | 9900                                                          |
| unique                 | 2890 ( $R_{\text{int}} = 0.0460$ )                            |
| observed               | 2699 ( $ F /\sigma(F) > 4.0$ )                                |

### Data correction, structure solution and refinement

|                                                   |                                                                                                                                                                                                                                                                                                                            |
|---------------------------------------------------|----------------------------------------------------------------------------------------------------------------------------------------------------------------------------------------------------------------------------------------------------------------------------------------------------------------------------|
| corrections                                       | Lorentz and polarisation correction.                                                                                                                                                                                                                                                                                       |
| Structure solution                                | Program: SIR-97 (Direct methods)                                                                                                                                                                                                                                                                                           |
| refinement                                        | Program: SHELXL-97 (full matrix). 193 refined parameters, weighting scheme:<br>$w = 1/[\sigma^2(F_o^2) + (0.0979 \cdot P)^2 + 0.14 \cdot P]$<br>with $(\text{Max}(F_o^2, 0) + 2 \cdot F_o^2)/3$ . H-atoms at calculated positions and refined with isotropic displacement parameters, non H-atoms refined anisotropically. |
| R-values                                          | $wR2 = 0.1305$ ( $R1 = 0.0480$ for observed reflections, 0.0502 for all reflections)                                                                                                                                                                                                                                       |
| goodness of fit                                   | $S = 1.080$                                                                                                                                                                                                                                                                                                                |
| Flack parameter                                   | $x = 0.2(2)$                                                                                                                                                                                                                                                                                                               |
| maximum deviation<br>of parameters                | 0.001 * e.s.d                                                                                                                                                                                                                                                                                                              |
| maximum peak height in<br>diff. Fourier synthesis | 0.19, -0.27 e $\text{\AA}^{-3}$                                                                                                                                                                                                                                                                                            |

final coordinates and equivalent displacement parameters (Å<sup>2</sup>)

$$U_{\text{eq}} = (1/3) * \sum_{ij} a_i * a_j * \mathbf{a}_i \cdot \mathbf{a}_j$$

| Atom | X          | Y         | Z          | U <sub>eq</sub> |
|------|------------|-----------|------------|-----------------|
| C1   | 0.5484(2)  | 0.3368(2) | 0.1694(1)  | 0.0390(5)       |
| C2   | 0.7024(2)  | 0.3650(1) | 0.2110(1)  | 0.0366(5)       |
| C3   | 0.7032(2)  | 0.4569(2) | 0.2792(1)  | 0.0397(6)       |
| C4   | 0.8632(2)  | 0.4697(2) | 0.3174(1)  | 0.0412(6)       |
| C5   | 0.9359(2)  | 0.3678(2) | 0.3541(1)  | 0.0392(6)       |
| C6   | 0.9256(2)  | 0.2776(2) | 0.2869(1)  | 0.0386(5)       |
| C7   | 0.7651(2)  | 0.2612(2) | 0.2532(1)  | 0.0373(5)       |
| C8   | 0.7581(2)  | 0.1656(2) | 0.1931(1)  | 0.0455(6)       |
| C9   | 0.6722(3)  | 0.1616(2) | 0.1226(1)  | 0.0468(6)       |
| C10  | 0.5680(2)  | 0.2511(2) | 0.0954(1)  | 0.0429(6)       |
| C11  | 0.4564(2)  | 0.4282(2) | 0.1332(1)  | 0.0397(6)       |
| C12  | 0.3065(2)  | 0.4319(2) | 0.1374(1)  | 0.0405(6)       |
| C13  | 0.2137(2)  | 0.5104(2) | 0.0923(1)  | 0.0394(6)       |
| C14  | 0.0655(2)  | 0.4997(2) | 0.0813(1)  | 0.0406(6)       |
| C15  | -0.0256(2) | 0.5750(2) | 0.0285(1)  | 0.0383(5)       |
| O16  | -0.1656(2) | 0.5410(1) | 0.01969(9) | 0.0482(5)       |
| O17  | 0.0206(2)  | 0.6583(1) | -0.0037(1) | 0.0487(4)       |
| C18  | 0.6555(3)  | 0.5689(2) | 0.2454(2)  | 0.0507(7)       |
| O19  | 0.8473(2)  | 0.3376(1) | 0.42966(8) | 0.0452(4)       |
| C20  | 1.0969(3)  | 0.3885(2) | 0.3822(2)  | 0.0499(7)       |
| C21  | 0.6198(3)  | 0.2989(2) | 0.0080(1)  | 0.0516(7)       |

anisotropic displacement parameters

| Atom | U <sub>11</sub> | U <sub>22</sub> | U <sub>33</sub> | U <sub>12</sub> | U <sub>13</sub> | U <sub>23</sub> |
|------|-----------------|-----------------|-----------------|-----------------|-----------------|-----------------|
| C1   | 0.0351(9)       | 0.0407(10)      | 0.0413(9)       | -0.0019(8)      | -0.0002(8)      | 0.0043(8)       |
| C2   | 0.0338(10)      | 0.0377(9)       | 0.0383(9)       | 0.0005(7)       | 0.0039(7)       | 0.0002(7)       |
| C3   | 0.040(1)        | 0.0394(10)      | 0.0398(9)       | 0.0050(8)       | 0.0011(8)       | -0.0032(8)      |
| C4   | 0.046(1)        | 0.0399(10)      | 0.0374(9)       | -0.0017(8)      | -0.0010(8)      | -0.0050(8)      |
| C5   | 0.0365(10)      | 0.0428(10)      | 0.0383(9)       | 0.0038(8)       | 0.0010(8)       | -0.0014(8)      |
| C6   | 0.0368(10)      | 0.0393(9)       | 0.0398(9)       | 0.0054(7)       | 0.0030(8)       | 0.0013(8)       |
| C7   | 0.036(1)        | 0.0379(9)       | 0.0382(9)       | 0.0005(8)       | -0.0002(7)      | -0.0006(8)      |
| C8   | 0.048(1)        | 0.0350(9)       | 0.054(1)        | 0.0053(9)       | -0.0038(9)      | -0.0050(9)      |
| C9   | 0.053(1)        | 0.0376(10)      | 0.050(1)        | 0.0000(9)       | -0.0046(9)      | -0.0088(8)      |
| C10  | 0.041(1)        | 0.044(1)        | 0.0430(10)      | -0.0054(8)      | -0.0047(8)      | -0.0005(9)      |
| C11  | 0.039(1)        | 0.044(1)        | 0.0367(9)       | -0.0026(8)      | -0.0010(8)      | 0.0007(8)       |
| C12  | 0.038(1)        | 0.047(1)        | 0.0364(9)       | 0.0011(8)       | 0.0005(7)       | -0.0016(8)      |
| C13  | 0.039(1)        | 0.0459(10)      | 0.0339(9)       | 0.0021(8)       | 0.0015(7)       | -0.0044(7)      |
| C14  | 0.039(1)        | 0.045(1)        | 0.0379(9)       | 0.0043(8)       | 0.0013(8)       | -0.0010(8)      |
| C15  | 0.038(1)        | 0.0424(10)      | 0.0342(9)       | 0.0011(8)       | -0.0001(7)      | -0.0059(7)      |
| O16  | 0.0370(8)       | 0.0507(8)       | 0.0570(8)       | -0.0020(6)      | -0.0082(6)      | 0.0120(7)       |
| O17  | 0.0499(8)       | 0.0439(7)       | 0.0524(8)       | -0.0076(6)      | -0.0076(6)      | 0.0038(6)       |
| C18  | 0.055(1)        | 0.040(1)        | 0.057(1)        | 0.0075(9)       | -0.008(1)       | -0.0078(9)      |
| O19  | 0.0488(8)       | 0.0475(8)       | 0.0393(7)       | 0.0118(6)       | 0.0044(6)       | 0.0018(6)       |
| C20  | 0.050(1)        | 0.050(1)        | 0.050(1)        | -0.0014(9)      | -0.0073(9)      | -0.0013(9)      |

C21 0.063(1) 0.050(1) 0.042(1) 0.0006(10) 0.0024(10) -0.0057(9)

final coordinates and isotropic displacement parameters ( $\text{\AA}^2$ ) for H- atoms

| Atom | X        | Y       | Z        | $U_{\text{iso}}$ |
|------|----------|---------|----------|------------------|
| H1   | 0.48634  | 0.30198 | 0.21592  | 0.0469           |
| H2   | 0.77252  | 0.38622 | 0.16293  | 0.0439           |
| H3   | 0.63363  | 0.43618 | 0.32760  | 0.0477           |
| H4A  | 0.92958  | 0.49866 | 0.27112  | 0.0494           |
| H4B  | 0.85896  | 0.52443 | 0.36439  | 0.0494           |
| H6A  | 0.96170  | 0.20941 | 0.31336  | 0.0463           |
| H6B  | 0.99253  | 0.29497 | 0.23722  | 0.0463           |
| H7   | 0.70014  | 0.24437 | 0.30464  | 0.0448           |
| H8   | 0.81884  | 0.10450 | 0.20632  | 0.0546           |
| H9   | 0.67665  | 0.09854 | 0.08736  | 0.0562           |
| H10  | 0.46689  | 0.21778 | 0.08538  | 0.0515           |
| H11  | 0.50762  | 0.48653 | 0.10588  | 0.0477           |
| H12  | 0.25706  | 0.37944 | 0.17245  | 0.0486           |
| H13  | 0.26123  | 0.57297 | 0.06924  | 0.0473           |
| H14  | 0.01605  | 0.44070 | 0.10885  | 0.0487           |
| H16  | -0.21444 | 0.58573 | -0.01030 | 0.0723           |
| H18A | 0.68095  | 0.62398 | 0.28887  | 0.076            |
| H18B | 0.54657  | 0.56947 | 0.23501  | 0.076            |
| H18C | 0.70854  | 0.58453 | 0.19087  | 0.076            |
| H19  | 0.88277  | 0.28084 | 0.45166  | 0.0678           |
| H20A | 1.09928  | 0.44899 | 0.42341  | 0.075            |
| H20B | 1.15821  | 0.40620 | 0.33111  | 0.075            |
| H20C | 1.13731  | 0.32355 | 0.41041  | 0.075            |
| H21A | 0.71031  | 0.34278 | 0.01708  | 0.0775           |
| H21B | 0.53948  | 0.34419 | -0.01622 | 0.0775           |
| H21C | 0.64257  | 0.24004 | -0.03273 | 0.0775           |
